# Supplementary material for: Identification of Anziaic Acid, a Lichen Depside from Hypotrachyna sp., as a New Topoisomerase Poison Inhibitor
Source: PubMed Central journal article supplement (PMC3620467; doi:10.1371/journal.pone.0060770), 2013-04-08

600-6581-4-5  
18 ENERO 2012

Figure S1-a

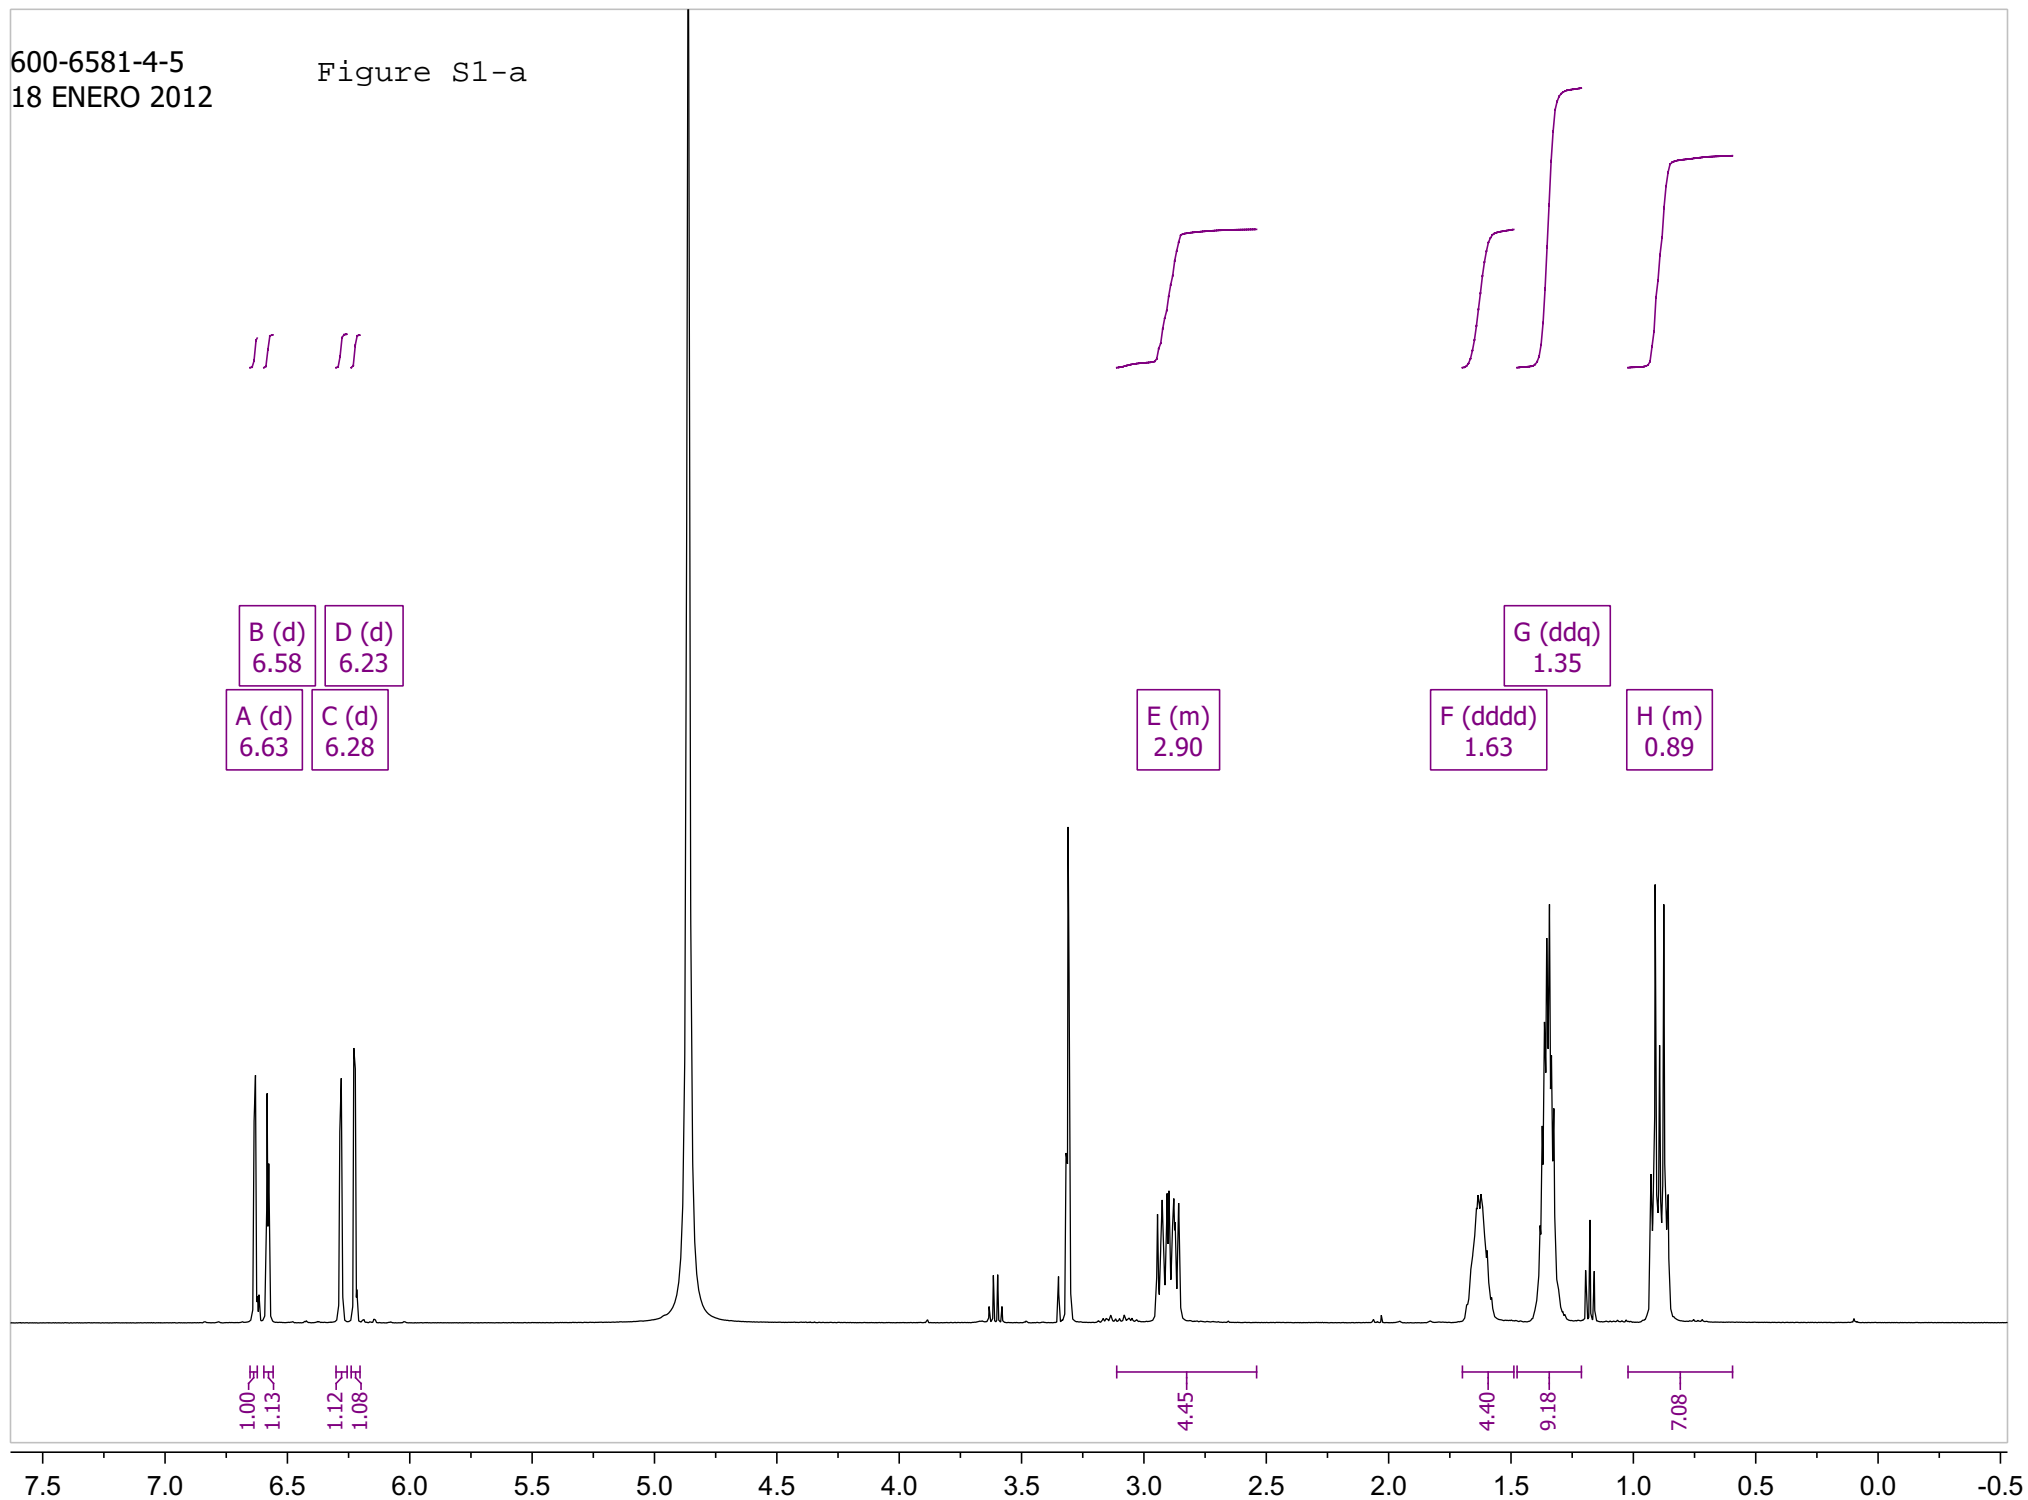

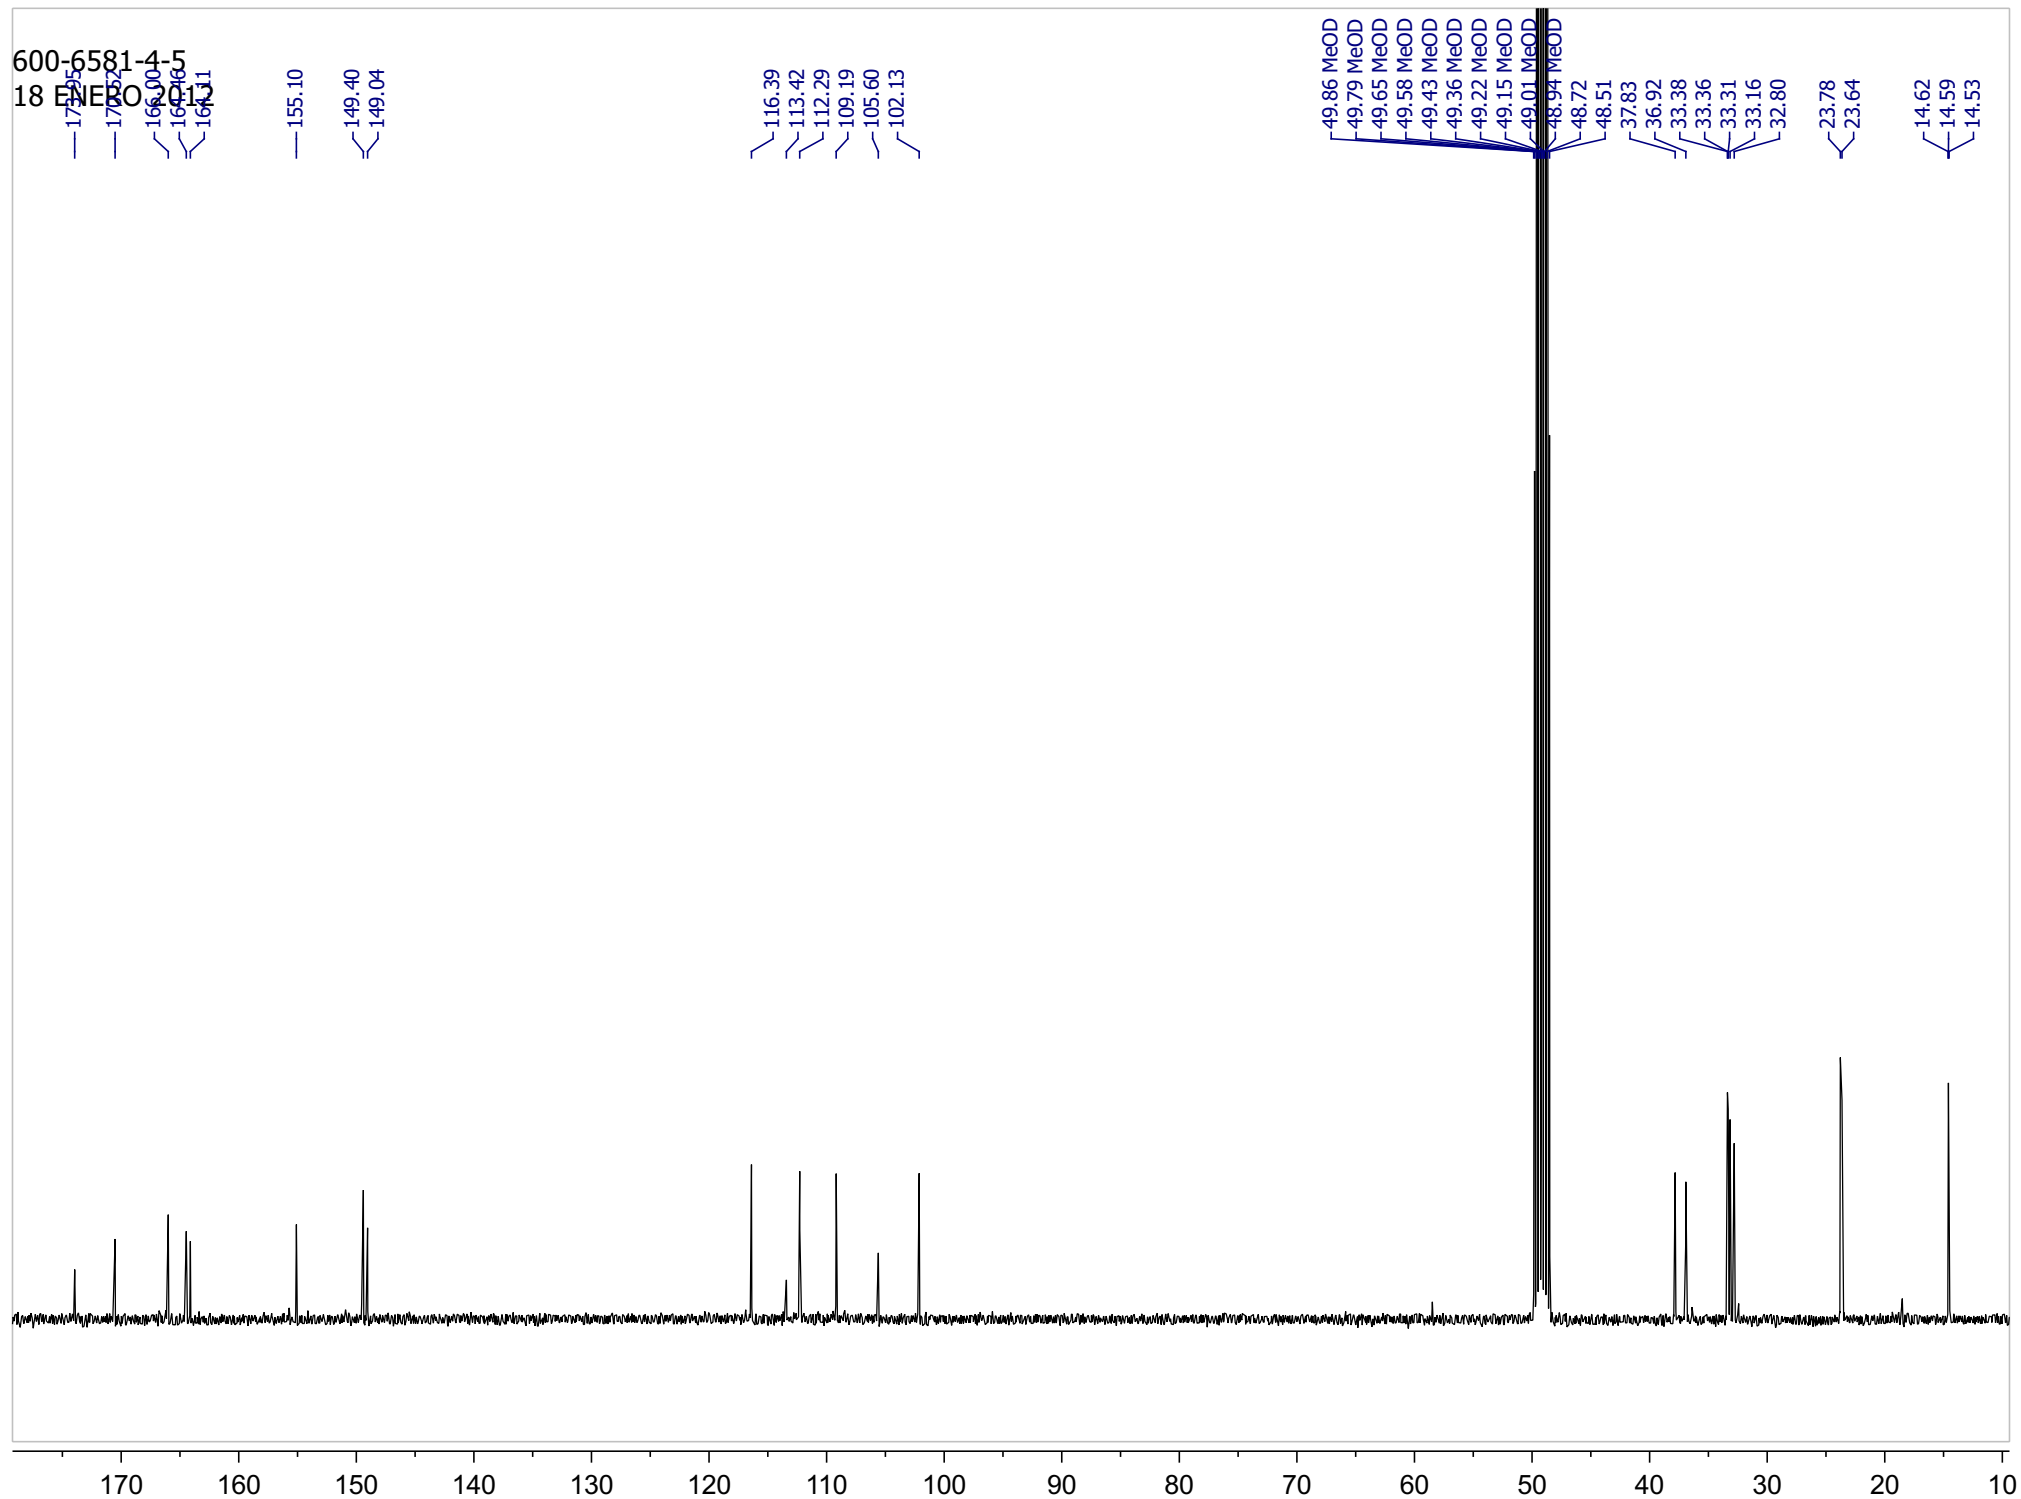

Figure S1-c

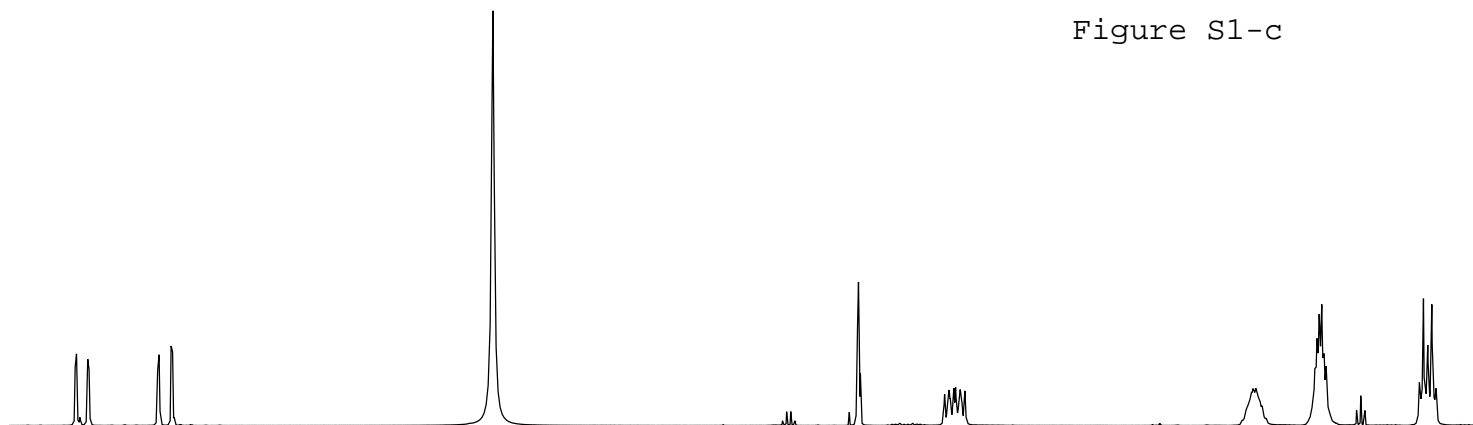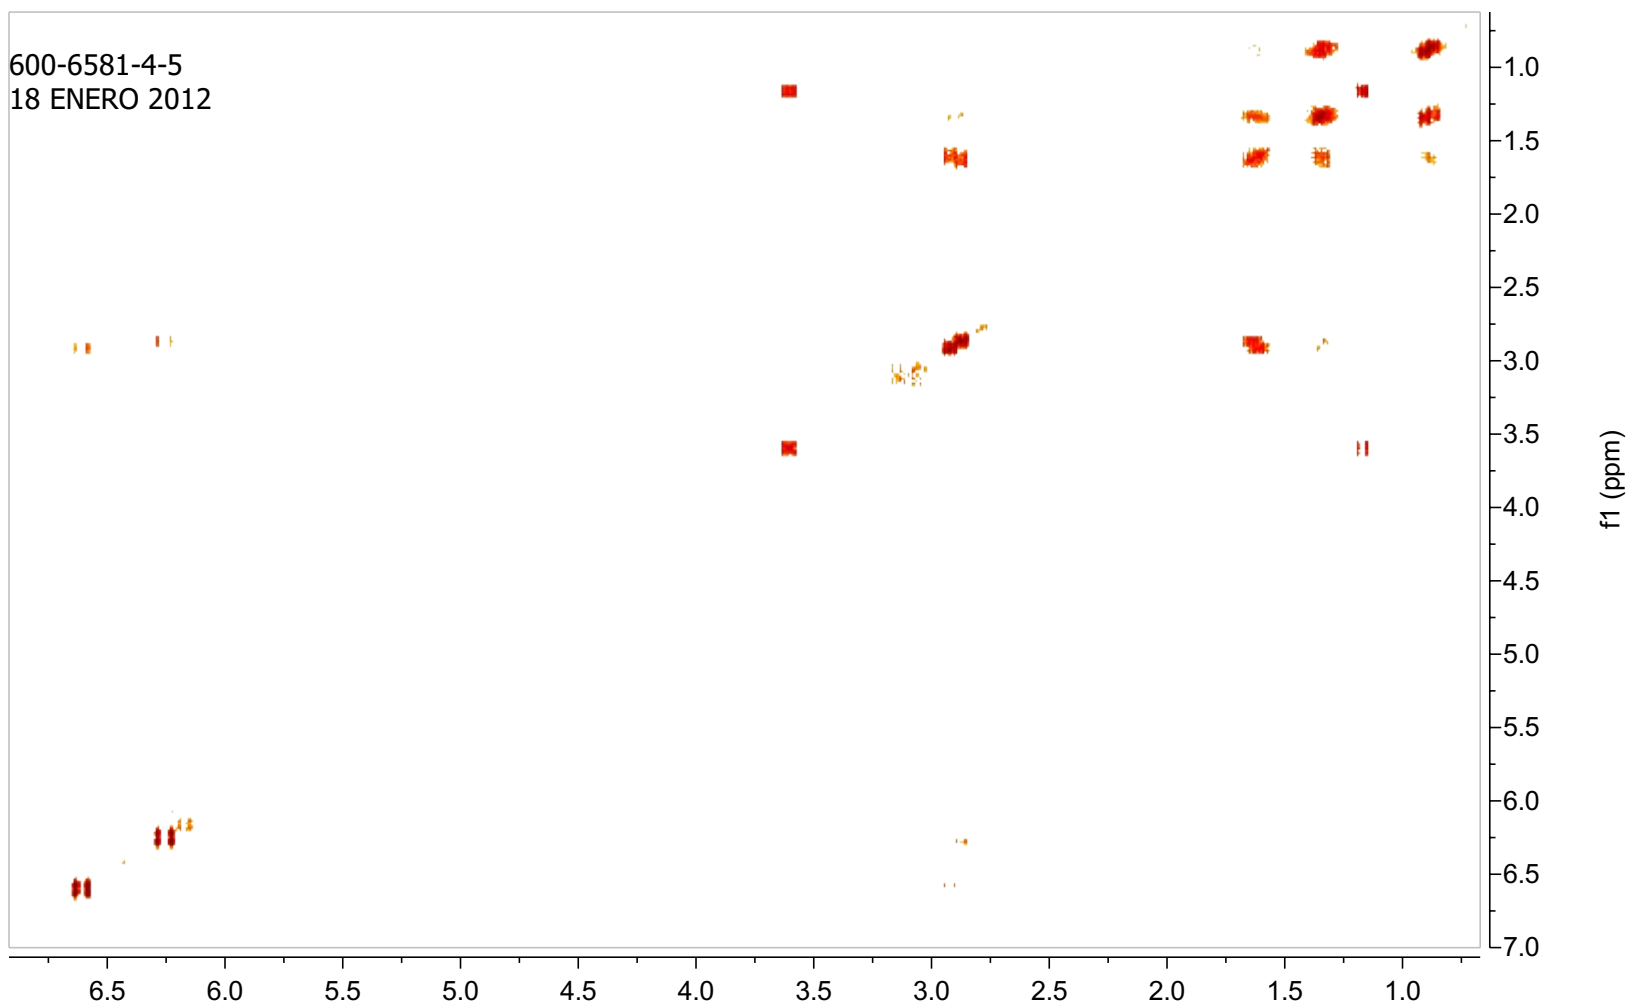

Figure S1-d

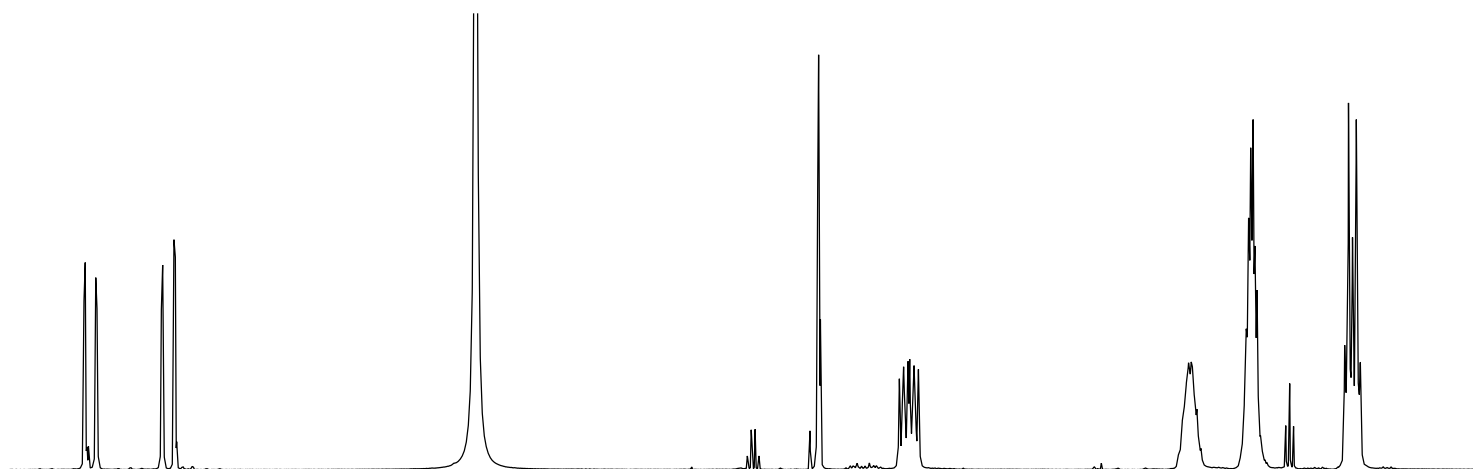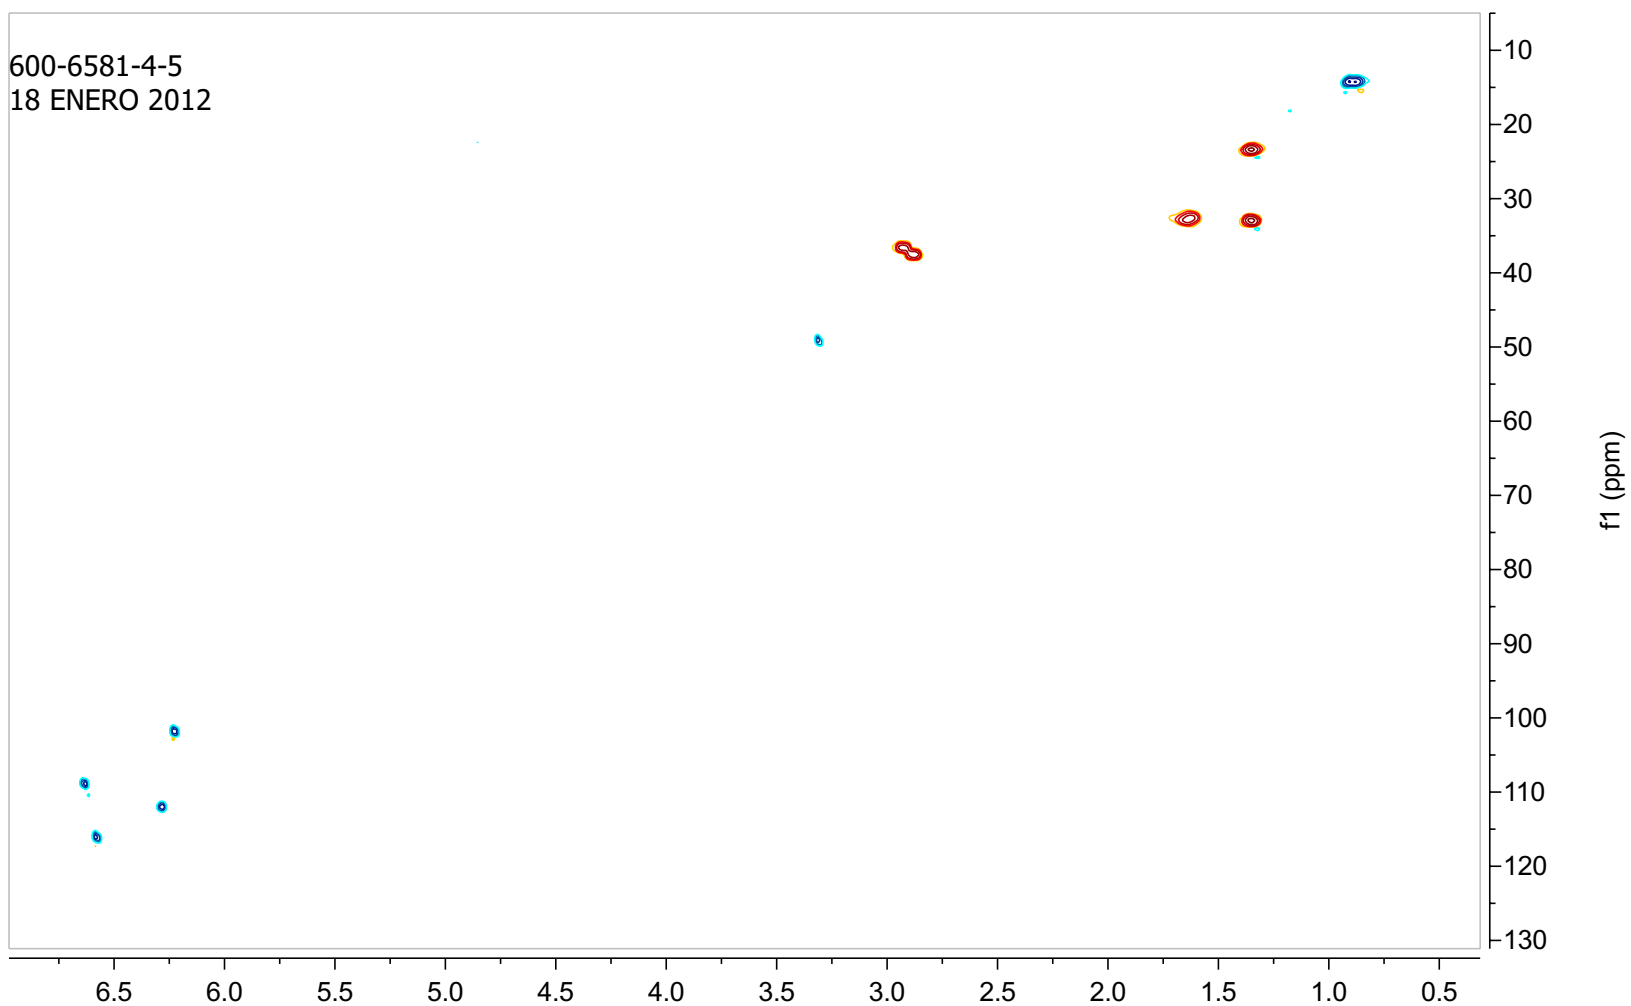

Figure S1-e

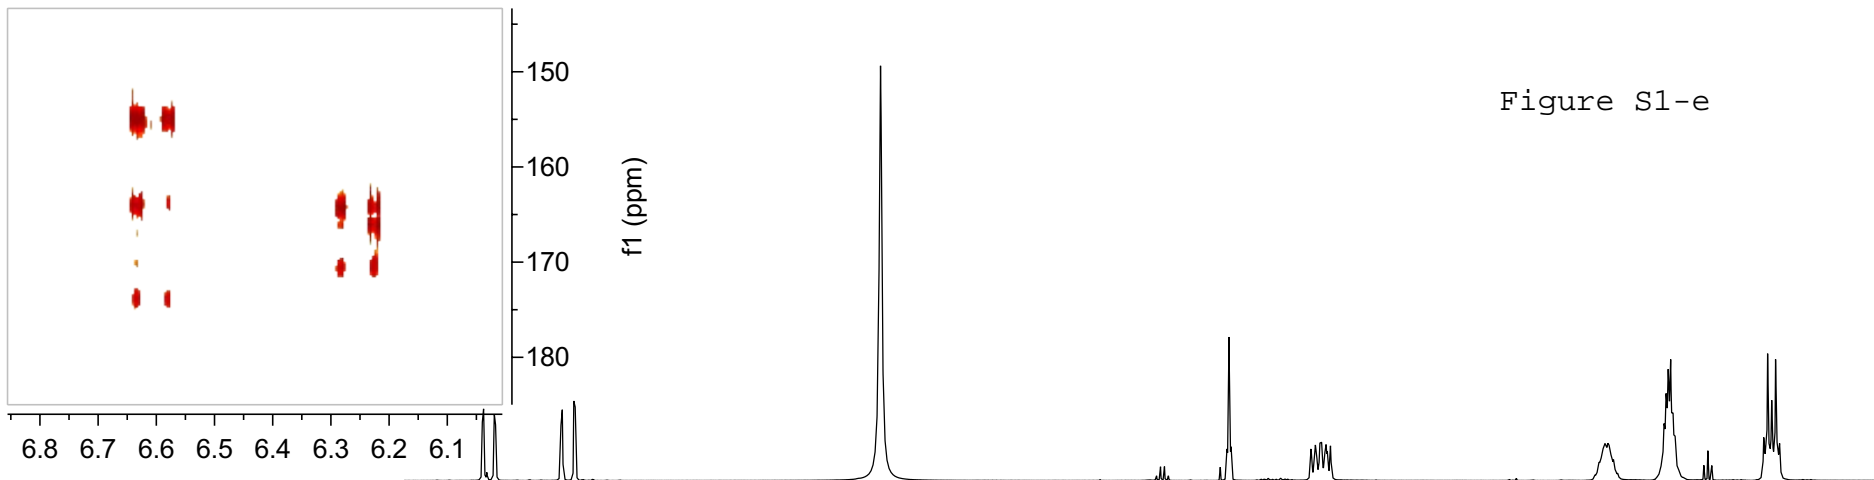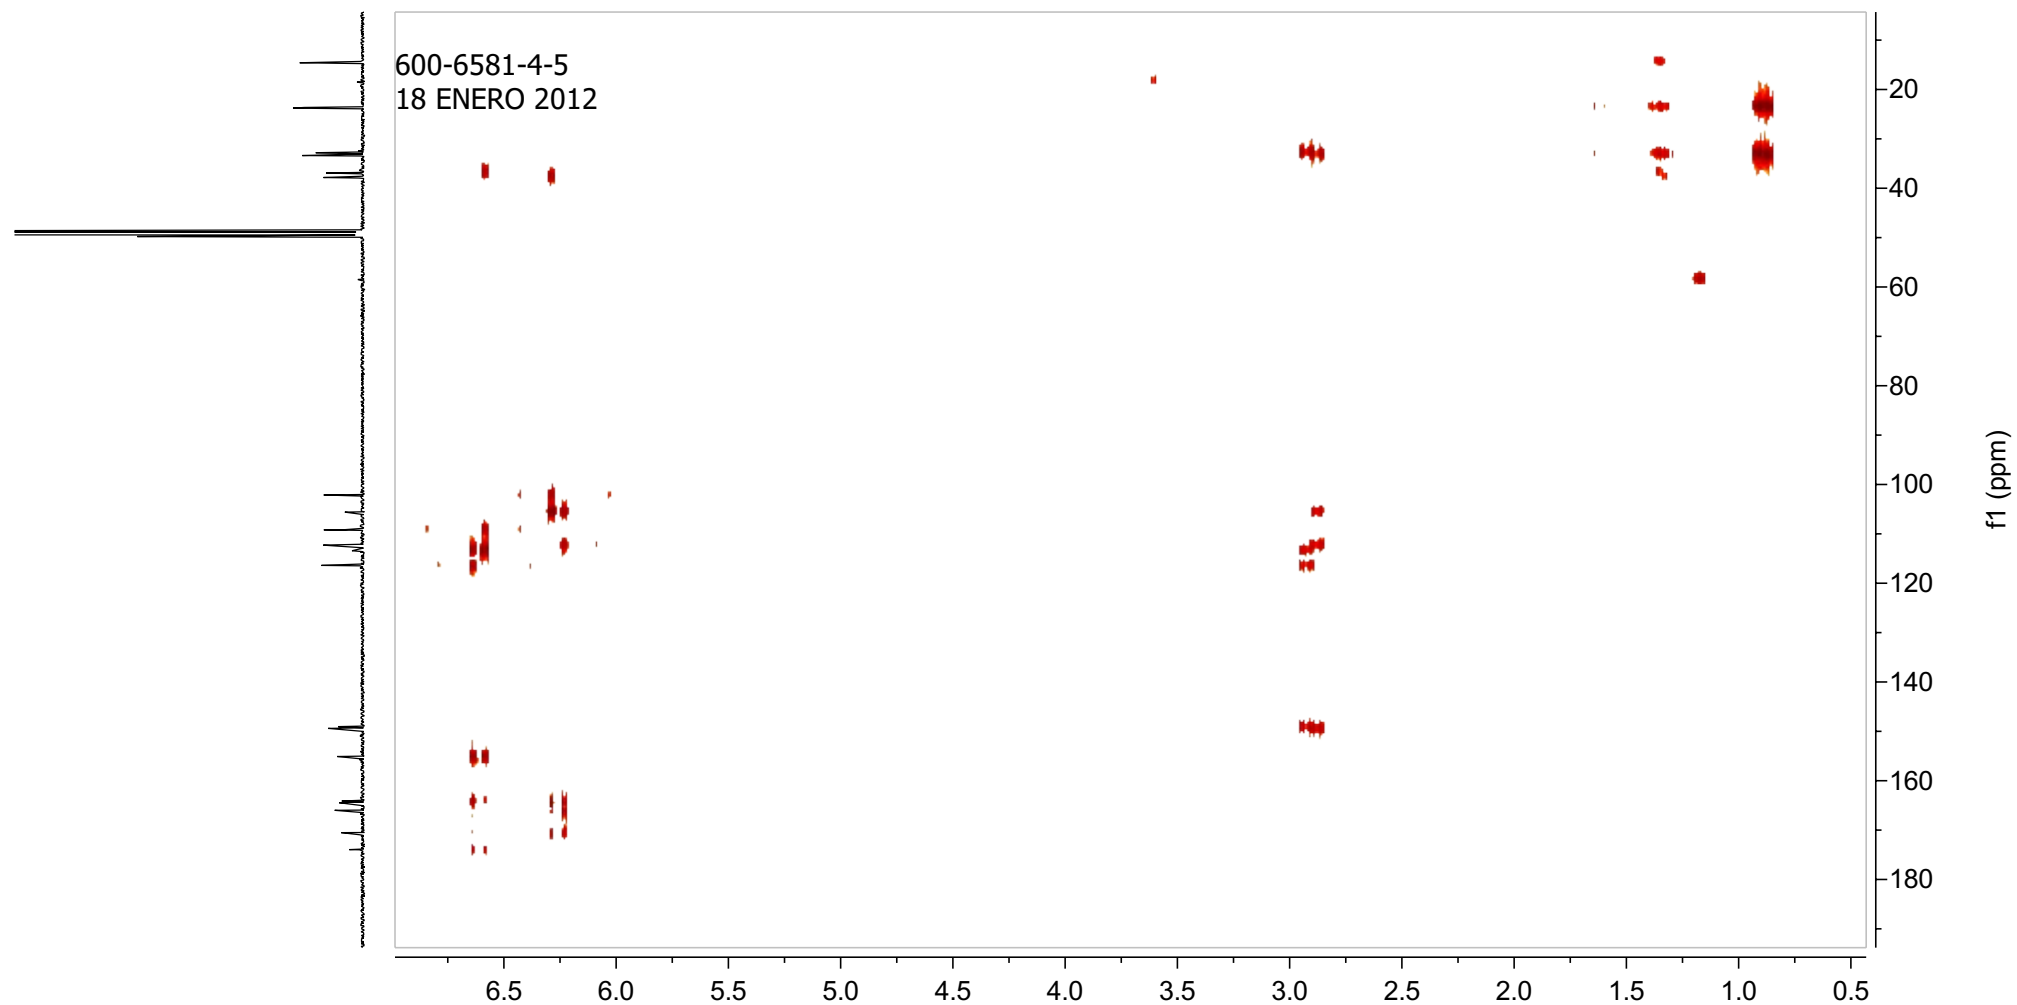

Supplement: pone.0060770.s001.pdf [file pone.0060770.s001.pdf]
