# Supplementary material for: Identification of Anziaic Acid, a Lichen Depside from Hypotrachyna sp., as a New Topoisomerase Poison Inhibitor
Source: PubMed Central journal article supplement (PMC3620467; doi:10.1371/journal.pone.0060770), 2013-04-08

Figure S2

The  $^1\text{H-NMR}$  presents two pair of doublets ( $J=2.42$  and  $2.32$  Hz respectively) in the aromatic region due to two meta-couplings protons at 6.22 and 6.28, and 6.63 and 6.58  $\delta\text{ppm}$ . The data presents two rests of  $n$ -pentyl units and two carbonyls signals attached to the phenyl rings, according to the gHMBC and gCOSY experiments:

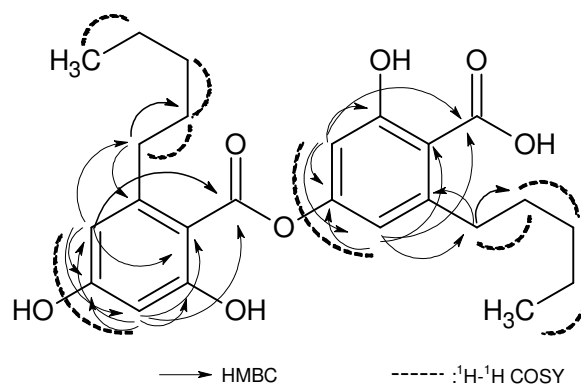

Supplement: pone.0060770.s002.pdf [file pone.0060770.s002.pdf]
