# Supplementary material for: Identification of Anziaic Acid, a Lichen Depside from Hypotrachyna sp., as a New Topoisomerase Poison Inhibitor
Source: PubMed Central journal article supplement (PMC3620467; doi:10.1371/journal.pone.0060770), 2013-04-08
Supplement: pone.0060770.s003.pdf [file pone.0060770.s003.pdf]

MS Spectrum

\*MSD2 SPC, time=18.650 of D:\DATA\SHUGENG\TSE-DINH\SC-9 2013-01-10 10-32-52\SC3-149-1\_10-100PACN-FA=0-20MIN.

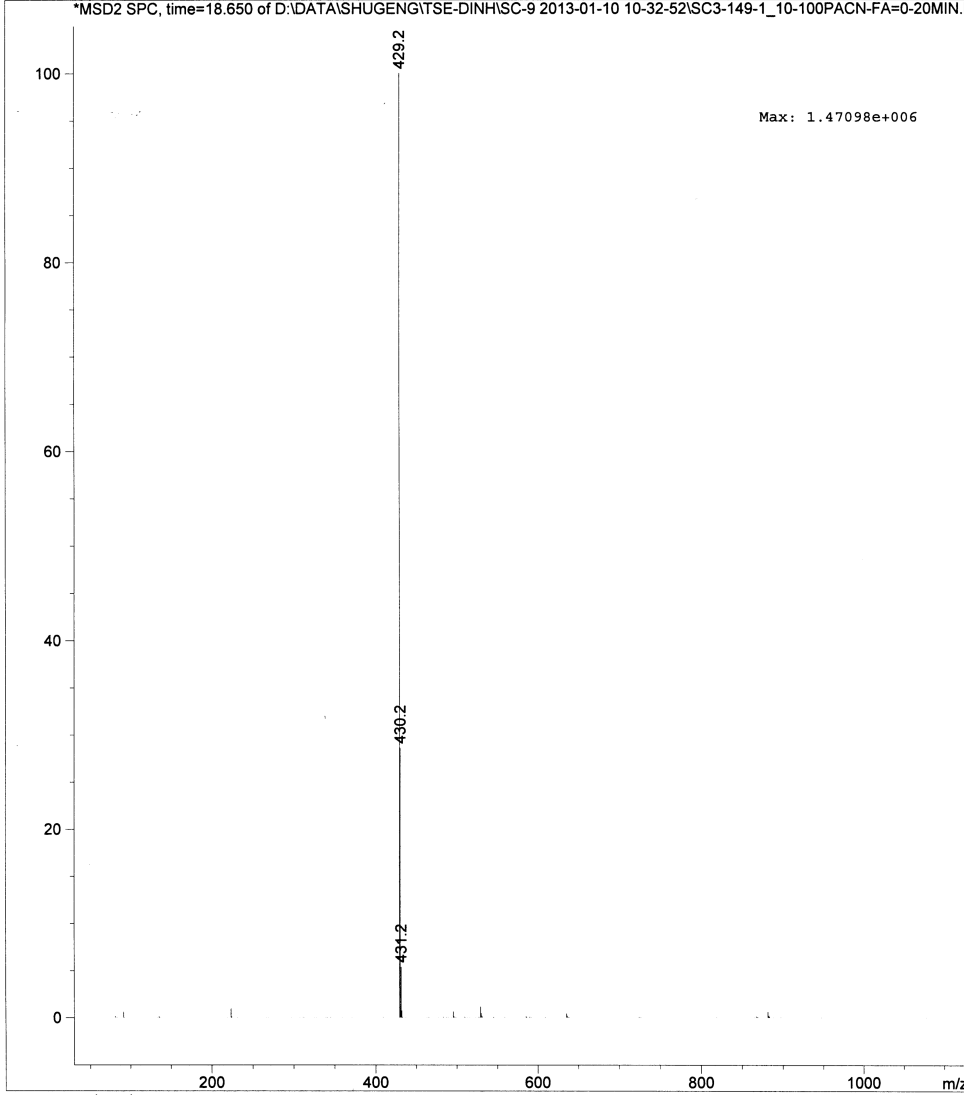

Figure S3
