# Supplementary material for: Identification of Anziaic Acid, a Lichen Depside from Hypotrachyna sp., as a New Topoisomerase Poison Inhibitor
Source: PubMed Central journal article supplement (PMC3620467; doi:10.1371/journal.pone.0060770), 2013-04-08
Supplement: pone.0060770.s004.pdf [file pone.0060770.s004.pdf]

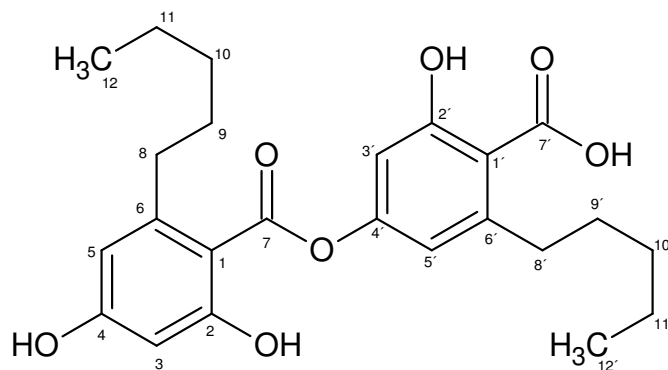

Table S1.  $^{13}\text{C}$  and  $^1\text{H}$  spectral data for anziaic acid in  $\text{CD}_3\text{OD}$ . <sup>a)</sup>

|     | $^{13}\text{C}$              | $^1\text{H}$  |
|-----|------------------------------|---------------|
| 1   | 105.60                       |               |
| 2   | 166.00                       |               |
| 3   | 102.13                       | 6.22 d (2.42) |
| 4   | 164.46                       |               |
| 5   | 112.29                       | 6.28 d (2.42) |
| 6   | 149.40                       |               |
| 7   | 170.52                       |               |
| 8   | 37.83                        | 2.86          |
| 9   | 32.83                        | 1.64          |
| 10  | 32.80 or 33.16 <sup>b)</sup> | 1.33          |
| 11  | 23.78 or 23.64 <sup>b)</sup> | 1.33          |
| 12  | 14.59 or 14.53 <sup>b)</sup> | 0.89          |
| 1'  | 113.42                       |               |
| 2'  | 164.11                       |               |
| 3'  | 109.19                       | 6.63 d (2.32) |
| 4'  | 155.10                       |               |
| 5'  | 116.39                       | 6.58 d (2.32) |
| 6'  | 149.04                       |               |
| 7'  | 173.95                       |               |
| 8'  | 36.92                        | 2.92          |
| 9'  | 32.80                        | 1.64          |
| 10' | 33.16 or 32.80 <sup>b)</sup> | 1.33          |
| 11' | 23.64 or 23.78 <sup>b)</sup> | 1.33          |
| 12' | 14.53 or 14.59 <sup>b)</sup> | 0.89          |

- a)  $^{13}\text{C}$  and  $^1\text{H}$  chemical shifts were recorded at 100 MHz and 400 MHz, respectively.  
 b) Chemical shifts interchangeable.
